# Supplementary material
Source: HighWire-hosted journal article supplement (https://bjo.bmj.com/content/108/4/536)
Supplement: inline-supplementary-material-3 [file inline-supplementary-material-3.pdf]

Supplementary Table 1. Baseline features of qOCT by treatment arm and ETDRS region.

| ETDRS region            | 1                       |                             |                                 | 2                       |                             |                                 | 3                       |                             |                                 |
|-------------------------|-------------------------|-----------------------------|---------------------------------|-------------------------|-----------------------------|---------------------------------|-------------------------|-----------------------------|---------------------------------|
|                         | Treatment               |                             |                                 | Treatment               |                             |                                 | Treatment               |                             |                                 |
|                         | Sham Combined<br>(N=65) | Pegcetacoplan EOM<br>(N=61) | Pegcetacoplan Monthly<br>(N=71) | Sham Combined<br>(N=65) | Pegcetacoplan EOM<br>(N=61) | Pegcetacoplan Monthly<br>(N=71) | Sham Combined<br>(N=65) | Pegcetacoplan EOM<br>(N=61) | Pegcetacoplan Monthly<br>(N=71) |
| <b>Characteristic</b>   |                         |                             |                                 |                         |                             |                                 |                         |                             |                                 |
| <b>RORA</b>             |                         |                             |                                 |                         |                             |                                 |                         |                             |                                 |
| Mean (SD)               | 0.470 (0.283)           | 0.455 (0.298)               | 0.487 (0.293)                   | 0.934 (0.481)           | 0.964 (0.462)               | 0.817 (0.478)                   | 0.889 (0.475)           | 0.942 (0.528)               | 0.910 (0.485)                   |
| Median [Min, Max]       | 0.564 [0, 0.801]        | 0.549 [0, 0.801]            | 0.577 [0, 0.801]                | 1.02 [0, 1.60]          | 0.993 [0, 1.59]             | 0.742 [0, 1.60]                 | 0.889 [0.00140, 1.60]   | 0.986 [0.221, 1.61]         | 0.986 [0, 1.60]                 |
| <b>PRD</b>              |                         |                             |                                 |                         |                             |                                 |                         |                             |                                 |
| Mean (SD)               | 0.708 (0.196)           | 0.700 (0.202)               | 0.709 (0.174)                   | 1.33 (0.379)            | 1.37 (0.300)                | 1.32 (0.319)                    | 1.34 (0.325)            | 1.34 (0.378)                | 1.35 (0.331)                    |
| Median [Min, Max]       | 0.798 [0.0462, 0.807]   | 0.795 [0.0378, 0.804]       | 0.798 [0.0910, 0.804]           | 1.53 [0.237, 1.62]      | 1.53 [0.517, 1.60]          | 1.41 [0.192, 1.60]              | 1.51 [0.534, 1.60]      | 1.53 [0.221, 1.61]          | 1.52 [0.333, 1.60]              |
| <b>PRD in isolation</b> |                         |                             |                                 |                         |                             |                                 |                         |                             |                                 |
| Mean (SD)               | 0.214 (0.218)           | 0.228 (0.221)               | 0.204 (0.207)                   | 0.348 (280)             | 0.360 (0.315)               | 0.453 (0.342)                   | 0.406 (0.305)           | 0.363 (0.311)               | 0.412 (0.302)                   |
| Median [Min, Max]       | 0.126 [0, 0.766]        | 0.158 [0, 0.674]            | 0.164 [0, 0.787]                | 0.274 [0, 1.24]         | 0.287 [0, 1.26]             | 0.382 [0, 1.39]                 | 0.353 [0, 1.43]         | 0.332 [0, 1.17]             | 0.342 [0, 1.21]                 |
| <b>RPE loss</b>         |                         |                             |                                 |                         |                             |                                 |                         |                             |                                 |
| Mean (SD)               | 0.496 (0.286)           | 0.472 (0.298)               | 0.506 (0.295)                   | 0.987 (0.489)           | 1.01 (0.476)                | 0.865 (0.480)                   | 0.931 (0.482)           | 0.977 (0.536)               | 0.940 (0.488)                   |
| Median [Min, Max]       | 0.637 [0, 0.801]        | 0.573 [0, 0.801]            | 0.602 [0, 0.804]                | 1.16 [0, 1.60]          | 1.02 [0, 1.59]              | 0.804 [0, 1.60]                 | 0.952 [0.00140, 1.60]   | 0.992 [0, 1.60]             | 1.01 [0, 1.60]                  |
| <b>HTR</b>              |                         |                             |                                 |                         |                             |                                 |                         |                             |                                 |
| Mean (SD)               | 0.556 (0.252)           | 0.526 (0.271)               | 0.558 (0.276)                   | 1.05 (0.466)            | 1.08 (0.393)                | 0.968 (0.426)                   | 1.04 (0.436)            | 1.04 (0.481)                | 1.03 (0.470)                    |
| Median [Min, Max]       | 0.664 [0, 0.801]        | 0.604 [0, 0.804]            | 0.692 [0.00840, 0.801]          | 1.21 [0, 1.60]          | 1.07 [0.224, 1.59]          | 0.971 [0, 1.60]                 | 1.15 [0.0168, 1.60]     | 1.12 [0, 1.60]              | 1.12 [0, 1.60]                  |
| <b>Intact macula</b>    |                         |                             |                                 |                         |                             |                                 |                         |                             |                                 |
| Mean (SD)               | 0.0845 (0.190)          | 0.101 (0.202)               | 0.0909 (0.174)                  | 0.243 (0.366)           | 0.228 (0.301)               | 0.274 (0.317)                   | 0.251 (0.314)           | 0.264 (378)                 | 0.252 (0.331)                   |
| Median [Min, Max]       | 0 [0, 0.755]            | 0 [0, 0.763]                | 0 [0, 0.710]                    | 0.0546 [0, 1.36]        | 0.0630 [0, 1.08]            | 0.182 [0, 1.40]                 | 0.0854 [0, 1.07]        | 0.0644 [0, 1.38]            | 0.0784 [0, 1.27]                |

| ETDRS region            | 4                          |                                |                                    | 5                          |                                |                                    | 6                          |                                |                                    |
|-------------------------|----------------------------|--------------------------------|------------------------------------|----------------------------|--------------------------------|------------------------------------|----------------------------|--------------------------------|------------------------------------|
|                         | Treatment                  |                                |                                    | Treatment                  |                                |                                    | Treatment                  |                                |                                    |
|                         | Sham<br>Combined<br>(N=65) | Pegcetacoplan<br>EOM<br>(N=61) | Pegcetacoplan<br>Monthly<br>(N=71) | Sham<br>Combined<br>(N=65) | Pegcetacoplan<br>EOM<br>(N=61) | Pegcetacoplan<br>Monthly<br>(N=71) | Sham<br>Combined<br>(N=65) | Pegcetacoplan<br>EOM<br>(N=61) | Pegcetacoplan<br>Monthly<br>(N=71) |
| Characteristic          |                            |                                |                                    |                            |                                |                                    |                            |                                |                                    |
| <b>RORA</b>             |                            |                                |                                    |                            |                                |                                    |                            |                                |                                    |
| Mean (SD)               | 0.962 (0.508)              | 0.986 (0.502)                  | 0.006 (0.474)                      | 0.937 (0.479)              | 0.828 (0.513)                  | 0.876 (0.483)                      | 0.668 (0.779)              | 0.661 (0.854)                  | 0.391 (0.499)                      |
| Median [Min,<br>Max]    | 1.06<br>[0, 1.60]          | 1.05<br>[0, 1.60]              | 1.02<br>[0.0182, 1.60]             | 0.986<br>[0, 1.60]         | 0.763<br>[0, 1.60]             | 0.929<br>[0, 1.60]                 | 0.434<br>[0, 3.46]         | 0.368<br>[0, 4.45]             | 0.185<br>[0, 2.19]                 |
| <b>PRD</b>              |                            |                                |                                    |                            |                                |                                    |                            |                                |                                    |
| Mean (SD)               | 1.30 (0.397)               | 1.34 (0.417)                   | 1.41 (0.297)                       | 1.29 (0.412)               | 1.25 (0.432)                   | 1.29 (0.410)                       | 1.75 (1.40)                | 1.83 (1.44)                    | 1.40 (1.20)                        |
| Median [Min,<br>Max]    | 1.51<br>[0.340, 1.62]      | 1.55<br>[0.0266, 1.60]         | 1.56<br>[0.116, 1.60]              | 1.46<br>[0, 1.60]          | 1.38<br>[0.0651, 1.61]         | 1.49<br>[0.0420, 1.60]             | 1.53<br>[0, 5.43]          | 1.39<br>[0, 5.17]              | 1.21<br>[0, 5.42]                  |
| <b>PRD in isolation</b> |                            |                                |                                    |                            |                                |                                    |                            |                                |                                    |
| Mean (SD)               | 0.300 (0.263)              | 0.314 (0.259)                  | 0.379 (0.314)                      | 0.323 (0.237)              | 0.390 (0.291)                  | 0.384 (0.272)                      | 0.982 (0.891)              | 1.08 (0.924)                   | 0.925 (0.803)                      |
| Median [Min,<br>Max]    | 0.230<br>[0, 1.10]         | 0.217<br>[0, 896]              | 0.332<br>[0, 1.36]                 | 0.318<br>[0, 1.07]         | 0.368<br>[0, 1.33]             | 0.343<br>[0, 1.23]                 | 0.587<br>[0, 3.84]         | 0.829<br>[0, 3.83]             | 0.752<br>[0, 3.51]                 |
| <b>RPE loss</b>         |                            |                                |                                    |                            |                                |                                    |                            |                                |                                    |
| Mean (SD)               | 1.00 (0.518)               | 1.02 (0.510)                   | 1.03 (0.468)                       | 0.965 (0.483)              | 0.856 (0.517)                  | 0.905 (0.492)                      | 0.791 (0.870)              | 0.765 (0.896)                  | 0.487 (0.568)                      |
| Median [Min,<br>Max]    | 1.10<br>[0.00420, 1.60]    | 1.08<br>[0, 1.60]              | 1.14<br>[0.0252, 1.60]             | 0.994<br>[0, 1.60]         | 0.779<br>[0, 1.60]             | 0.944<br>[0, 1.60]                 | 0.504<br>[0, 4.10]         | 0.441<br>[0, 4.46]             | 0.260<br>[0, 2.53]                 |
| <b>HTR</b>              |                            |                                |                                    |                            |                                |                                    |                            |                                |                                    |
| Mean (SD)               | 1.05 (0.483)               | 1.08 (0.484)                   | 1.11 (0.433)                       | 1.06 (0.481)               | 0.961 (0.492)                  | 1.00 (0.462)                       | 0.772 (0.862)              | 0.853 (0.932)                  | 0.534 (0.653)                      |
| Median [Min,<br>Max]    | 1.19<br>[0.0665, 1.60]     | 1.25<br>[0.0168, 1.60]         | 1.24<br>[0.0336, 1.60]             | 1.15<br>[0, 1.60]          | 1.03<br>[0, 1.60]              | 1.10<br>[0, 1.60]                  | 0.518<br>[0, 4.42]         | 0.518<br>[0, 4.50]             | 0.312<br>[0, 3.26]                 |
| <b>Intact macula</b>    |                            |                                |                                    |                            |                                |                                    |                            |                                |                                    |
| Mean (SD)               | 0.282 (0.394)              | 0.256 (0.417)                  | 0.186 (0.297)                      | 0.292 (0.381)              | 0.358 (0.431)                  | 0.315 (0.410)                      | 3.07 (1.59)                | 3.18 (1.52)                    | 3.62 (1.27)                        |
| Median [Min,<br>Max]    | 0.0756<br>[0, 1.26]        | 0.0420<br>[0, 1.57]            | 0.0308<br>[0, 1.48]                | 0.0980<br>[0, 1.58]        | 0.224<br>[0, 1.54]             | 0.109<br>[0, 1.56]                 | 3.44<br>[0, 5.40]          | 3.66<br>[0, 5.27]              | 3.79<br>[0.00980, 5.35]            |

| ETDRS region            | 7                       |                             |                                 | 8                       |                             |                                 | 9                       |                             |                                 |
|-------------------------|-------------------------|-----------------------------|---------------------------------|-------------------------|-----------------------------|---------------------------------|-------------------------|-----------------------------|---------------------------------|
| Treatment               | Sham Combined<br>(N=65) | Pegcetacoplan EOM<br>(N=61) | Pegcetacoplan Monthly<br>(N=71) | Sham Combined<br>(N=65) | Pegcetacoplan EOM<br>(N=61) | Pegcetacoplan Monthly<br>(N=71) | Sham Combined<br>(N=65) | Pegcetacoplan EOM<br>(N=61) | Pegcetacoplan Monthly<br>(N=71) |
| <b>Characteristic</b>   |                         |                             |                                 |                         |                             |                                 |                         |                             |                                 |
| <b>RORA</b>             |                         |                             |                                 |                         |                             |                                 |                         |                             |                                 |
| Mean (SD)               | 0.822 (0.923)           | 1.07 (1.09)                 | 0.862 (1.02)                    | 0.763 (1.07)            | 0.865 (0.957)               | 0.897 (0.925)                   | 0.653 (0.963)           | 0.593 (0.755)               | 0.356 (0.530)                   |
| Median [Min, Max]       | 0.503 [0, 3.82]         | 0.776 [0, 4.02]             | 0.490 [0, 4.66]                 | 0.265 [0, 3.85]         | 0.622 [0, 4.06]             | 0.772 [0, 3.47]                 | 0.274 [0, 5.02]         | 0.287 [0, 3.39]             | 0.146 [0, 2.82]                 |
| <b>PRD</b>              |                         |                             |                                 |                         |                             |                                 |                         |                             |                                 |
| Mean (SD)               | 1.77 (1.44)             | 2.17 (1.64)                 | 1.78 (1.40)                     | 1.83 (1.65)             | 2.19 (1.65)                 | 2.15 (1.49)                     | 1.47 (1.44)             | 1.45 (1.36)                 | 1.16 (1.05)                     |
| Median [Min, Max]       | 1.30 [0, 4.97]          | 2.02 [0, 5.15]              | 1.56 [0, 5.37]                  | 1.30 [0, 5.37]          | 2.01 [0, 5.43]              | 1.89 [0, 5.12]                  | 0.978 [0, 5.37]         | 1.15 [0, 5.29]              | 0.882 [0, 4.72]                 |
| <b>PRD in isolation</b> |                         |                             |                                 |                         |                             |                                 |                         |                             |                                 |
| Mean (SD)               | 0.810 (0.658)           | 0.975 (0.816)               | 0.841 (0.666)                   | 0.999 (1.00)            | 1.23 (1.14)                 | 1.18 (0.900)                    | 0.744 (0.698)           | 0.820 (0.847)               | 0.761 (0.751)                   |
| Median [Min, Max]       | 0.612 [0, 3.52]         | 0.787 [0, 3.29]             | 0.774 [0, 3.39]                 | 0.590 [0, 4.87]         | 0.954 [0, 4.34]             | 1.00 [0, 3.78]                  | 0.597 [0, 3.03]         | 0.619 [0, 4.91]             | 0.630 [0, 4.12]                 |
| <b>RPE loss</b>         |                         |                             |                                 |                         |                             |                                 |                         |                             |                                 |
| Mean (SD)               | 0.967 (1.01)            | 1.20 (1.18)                 | 0.945 (1.06)                    | 0.843 (1.12)            | 0.974 (1.00)                | 0.980 (0.969)                   | 0.732 (1.03)            | 0.638 (0.781)               | 0.398 (0.549)                   |
| Median [Min, Max]       | 0.609 [0, 4.03]         | 0.878 [0, 4.36]             | 0.562 [0, 4.86]                 | 0.314 [0, 4.13]         | 0.707 [0, 4.23]             | 0.780 [0, 3.78]                 | 0.331 [0, 5.19]         | 0.339 [0.344]               | 0.225 [0, 2.88]                 |
| <b>HTR</b>              |                         |                             |                                 |                         |                             |                                 |                         |                             |                                 |
| Mean (SD)               | 0.920 (0.973)           | 1.25 (1.17)                 | 1.01 (1.07)                     | 0.950 (1.18)            | 1.12 (1.13)                 | 1.12 (1.09)                     | 0.788 (1.05)            | 0.740 (0.866)               | 0.494 (0.681)                   |
| Median [Min, Max]       | 0.601 [0, 4.31]         | 0.978 [0, 4.25]             | 0.636 [0, 4.67]                 | 0.559 [0, 4.14]         | 0.798 [0, 4.16]             | 0.851 [0, 3.86]                 | 0.274 [0, 5.13]         | 0.356 [0, 4.17]             | 0.259 [0, 4.05]                 |
| <b>Intact macula</b>    |                         |                             |                                 |                         |                             |                                 |                         |                             |                                 |
| Mean (SD)               | 3.25 (1.45)             | 2.89 (1.61)                 | 3.21 (1.50)                     | 2.91 (1.71)             | 2.62 (1.64)                 | 2.72 (1.51)                     | 3.37 (1.66)             | 3.57 (1.51)                 | 3.84 (1.27)                     |
| Median [Min, Max]       | 3.51 [0, 5.24]          | 2.95 [0.183, 5.41]          | 3.30 [0.0406, 5.41]             | 3.09 [0, 5.43]          | 2.87 [0, 5.28]              | 2.82 [0, 5.43]                  | 3.64 [0, 5.37]          | 3.82 [0.0420, 5.41]         | 4.05 [0.0882, 5.41]             |
