# Supplementary material
Source: HighWire-hosted journal article supplement (https://bjo.bmj.com/content/108/4/536)
Supplement: inline-supplementary-material-4 [file inline-supplementary-material-4.pdf]

Supplementary Table 2. Comparison of baseline qOCT features across treatment arms by foveal, parafoveal, and perifoveal regions.

| ETDRS sector            |                       |                       |                        |                   |                      |                       |                      |                     |                       |
|-------------------------|-----------------------|-----------------------|------------------------|-------------------|----------------------|-----------------------|----------------------|---------------------|-----------------------|
| Treatment               | Foveal                |                       |                        | Parafoveal        |                      |                       | Perifoveal           |                     |                       |
|                         | Sham Combined         | Pegcetacoplan EOM     | Pegcetacoplan Monthly  | Sham Combined     | Pegcetacoplan EOM    | Pegcetacoplan Monthly | Sham Combined        | Pegcetacoplan EOM   | Pegcetacoplan Monthly |
|                         | (N=65)                | (N=61)                | (N=71)                 | (N=65)            | (N=61)               | (N=71)                | (N=65)               | (N=61)              | (N=71)                |
| <b>Characteristic</b>   |                       |                       |                        |                   |                      |                       |                      |                     |                       |
| <b>RORA</b>             |                       |                       |                        |                   |                      |                       |                      |                     |                       |
| Mean (SD)               | 0.470 (0.283)         | 0.455 (0.298)         | 0.487 (0.293)          | 3.72 (1.40)       | 3.72 (1.53)          | 3.60 (1.41)           | 2.91 (2.74)          | 3.19 (2.50)         | 2.51 (2.14)           |
| Median [Min, Max]       | 0.564 [0, 0.801]      | 0.549 [0, 0.801]      | 0.577 [0, 0.801]       | 3.80 [1.37, 6.40] | 3.51 [1.27, 6.37]    | 3.56 [1.08, 6.28]     | 2.24 [0, 12.5]       | 2.86 [0.0210, 9.00] | 2.04 [0, 9.28]        |
| <b>PRD</b>              |                       |                       |                        |                   |                      |                       |                      |                     |                       |
| Mean (SD)               | 0.708 (0.196)         | 0.700 (0.202)         | 0.709 (0.174)          | 5.26 (1.14)       | 5.29 (1.13)          | 5.37 (0.974)          | 6.82 (4.77)          | 7.65 (5.09)         | 6.48 (4.00)           |
| Median [Min, Max]       | 0.798 [0.0462, 0.807] | 0.795 [0.0378, 0.804] | 0.798 [0.0910, 0.804]  | 5.53 [1.90, 6.40] | 5.81 [2.32, 6.40]    | 5.56 [2.54, 6.40]     | 6.43 [0.00840, 19.5] | 7.66 [0.402, 19.2]  | 5.20 [0.181, 17.7]    |
| <b>PRD in isolation</b> |                       |                       |                        |                   |                      |                       |                      |                     |                       |
| Mean (SD)               | 0.214 (0.218)         | 0.228 (0.221)         | 0.204 (0.207)          | 1.38 (0.803)      | 1.43 (0.916)         | 1.63 (0.922)          | 3.53 (2.61)          | 4.11 (3.33)         | 3.70 (2.48)           |
| Median [Min, Max]       | 0.126 [0, 0.766]      | 0.158 [0, 0.674]      | 0.164 [0, 0.787]       | 1.31 [0, 4.07]    | 1.37 [0.00420, 3.85] | 1.62 [0.0798, 3.93]   | 2.81 [0.00840, 12.8] | 2.98 [0.312, 13.9]  | 3.03 [0.168, 13.1]    |
| <b>RPE loss</b>         |                       |                       |                        |                   |                      |                       |                      |                     |                       |
| Mean (SD)               | 0.496 (0.286)         | 0.472 (0.298)         | 0.506 (0.295)          | 3.88 (1.43)       | 3.86 (1.55)          | 3.74 (1.38)           | 3.33 (3.14)          | 3.58 (2.66)         | 2.81 (2.25)           |
| Median [Min, Max]       | 0.637 [0, 0.801]      | 0.573 [0, 0.801]      | 0.602 [0, 0.804]       | 3.96 [1.44, 6.40] | 3.62 [1.30, 6.39]    | 3.74 [1.47, 6.32]     | 2.75 [0, 16.6]       | 2.99 [0.0210, 9.64] | 2.43 [0.00560, 10.2]  |
| <b>HTR</b>              |                       |                       |                        |                   |                      |                       |                      |                     |                       |
| Mean (SD)               | 0.556 (0.252)         | 0.526 (0.271)         | 0.558 (0.276)          | 4.19 (1.35)       | 4.17 (1.41)          | 4.12 (1.34)           | 3.43 (3.04)          | 3.97 (2.94)         | 3.17 (2.53)           |
| Median [Min, Max]       | 0.664 [0, 0.801]      | 0.604 [0, 0.804]      | 0.692 [0.00840, 0.801] | 4.30 [1.76, 6.40] | 4.10 [1.66, 6.38]    | 4.06 [1.19, 6.36]     | 2.98 [0, 13.2]       | 3.67 [0.139, 11.3]  | 2.73 [0, 10.4]        |
| <b>Intact macula</b>    |                       |                       |                        |                   |                      |                       |                      |                     |                       |
| Mean (SD)               | 0.0845 (0.190)        | 0.101 (0.202)         | 0.0909 (0.174)         | 1.07 (1.07)       | 1.11 (1.13)          | 1.03 (0.972)          | 12.6 (5.19)          | 12.3 (5.16)         | 13.4 (4.33)           |
| Median [Min, Max]       | 0 [0, 0.755]          | 0 [0, 0.763]          | 0 [0, 0.710]           | 0.723 [0, 4.17]   | 0.563 [0, 4.07]      | 0.833 [0, 3.86]       | 12.8 [0.202, 20.2]   | 12.7 [0.360, 20.2]  | 13.7 [1.66, 20.8]     |
